# Supplementary material for: The influence of phytochemical composition and resulting sensory attributes on preference for salad rocket (Eruca sativa) accessions by consumers of varying TAS2R38 diplotype
Source: PubMed Central journal article supplement — Food Chem. 2017 May 1;222:6–17. doi: 10.1016/j.foodchem.2016.11.153 (PMC5243146; doi:10.1016/j.foodchem.2016.11.153), 2017-05-01
Supplement: mmc1.pdf [file mmc1.pdf]

**Table S1** Summary table of correlation coefficients between agglomerative hierarchical clusters and phytochemical variables within a PCA of consumer liking scores.

| Variables                                            | Mouthfeel liking C1 | Mouthfeel liking C2 <sup>*A</sup> | Mouthfeel liking C3 | Taste liking C1* | Taste liking C2 | Purchase intent C1 | Purchase intent C2 <sup>*A</sup> | Purchase intent C3 | Bitter perception C1* | Bitter perception C2 <sup>*A</sup> | Hotness perception C1 <sup>*A</sup> | Hotness perception C2* | Hotness perception C3 <sup>*A</sup> | Sweetness perception C2 <sup>*A</sup> | Sweetness perception C3* | Pepper perception C1* | Pepper perception C3 <sup>*A</sup> |
|------------------------------------------------------|---------------------|-----------------------------------|---------------------|------------------|-----------------|--------------------|----------------------------------|--------------------|-----------------------|------------------------------------|-------------------------------------|------------------------|-------------------------------------|---------------------------------------|--------------------------|-----------------------|------------------------------------|
| <i>Glucosinolates</i>                                |                     |                                   |                     |                  |                 |                    |                                  |                    |                       |                                    |                                     |                        |                                     |                                       |                          |                       |                                    |
| 4-hydroxyglucobrassicin                              | -0.206              | -0.670                            | 0.289               | -0.190           | -0.098          | -0.249             | 0.702                            | -0.683             | -0.375                | -0.206                             | 0.317                               | 0.455                  | <b>0.805</b>                        | -0.400                                | <b>-0.826</b>            | 0.663                 | 0.203                              |
| Glucotropaeolin                                      | 0.441               | <b>0.789</b>                      | <b>-0.854</b>       | 0.686            | -0.603          | 0.551              | -0.339                           | 0.555              | 0.223                 | -0.600                             | -0.166                              | -0.127                 | -0.295                              | 0.159                                 | 0.272                    | -0.043                | -0.053                             |
| Glucoraphanin                                        | 0.344               | 0.190                             | 0.042               | 0.261            | 0.199           | 0.521              | -0.102                           | -0.210             | -0.742                | 0.135                              | -0.232                              | -0.133                 | 0.195                               | 0.535                                 | 0.115                    | -0.095                | 0.490                              |
| Glucoberverin                                        | -0.273              | 0.454                             | 0.019               | -0.214           | 0.331           | -0.001             | -0.228                           | 0.082              | 0.256                 | 0.648                              | 0.246                               | -0.705                 | -0.365                              | 0.489                                 | 0.364                    | -0.481                | -0.332                             |
| Glucosativin                                         | <b>-0.766</b>       | -0.737                            | 0.407               | -0.678           | -0.006          | <b>-0.841</b>      | 0.365                            | -0.484             | 0.300                 | 0.540                              | 0.730                               | -0.315                 | 0.420                               | -0.344                                | -0.532                   | -0.020                | -0.125                             |
| DMB                                                  | 0.095               | -0.432                            | 0.093               | -0.055           | -0.184          | -0.021             | -0.105                           | -0.330             | -0.630                | 0.358                              | -0.038                              | -0.186                 | 0.431                               | 0.557                                 | -0.318                   | 0.042                 | 0.328                              |
| Glucosylsucin                                        | 0.107               | -0.370                            | 0.167               | -0.067           | -0.028          | 0.015              | 0.544                            | -0.403             | -0.387                | -0.344                             | -0.125                              | <b>0.764</b>           | 0.444                               | -0.041                                | -0.656                   | <b>0.896</b>          | -0.217                             |
| Glucorucin                                           | 0.306               | 0.491                             | -0.394              | 0.358            | -0.198          | 0.521              | -0.402                           | 0.045              | -0.455                | 0.269                              | -0.071                              | -0.614                 | 0.016                               | <b>0.894</b>                          | 0.186                    | -0.291                | 0.236                              |
| Glucoraphenin                                        | 0.397               | 0.140                             | -0.180              | 0.265            | -0.140          | 0.416              | -0.385                           | -0.012             | -0.640                | 0.244                              | -0.300                              | -0.292                 | 0.084                               | <b>0.851</b>                          | 0.089                    | -0.134                | 0.295                              |
| Glucobarin                                           | 0.070               | -0.468                            | 0.330               | -0.044           | 0.144           | -0.252             | -0.364                           | 0.230              | 0.017                 | 0.036                              | -0.292                              | 0.055                  | -0.165                              | -0.514                                | 0.441                    | -0.590                | 0.648                              |
| Total GSL                                            | -0.447              | -0.671                            | 0.288               | -0.452           | -0.115          | -0.503             | 0.170                            | -0.557             | -0.241                | 0.628                              | 0.504                               | -0.427                 | 0.570                               | 0.216                                 | -0.541                   | -0.021                | 0.144                              |
| <i>Flavonols</i>                                     |                     |                                   |                     |                  |                 |                    |                                  |                    |                       |                                    |                                     |                        |                                     |                                       |                          |                       |                                    |
| Myricetin                                            | 0.517               | 0.518                             | -0.440              | 0.638            | -0.209          | 0.504              | -0.521                           | 0.591              | 0.040                 | -0.491                             | -0.422                              | -0.062                 | -0.387                              | -0.163                                | 0.667                    | -0.495                | 0.528                              |
| Kaempferol-3-glucoside                               | -0.115              | -0.261                            | -0.064              | -0.202           | -0.290          | -0.185             | 0.003                            | -0.239             | -0.197                | 0.373                              | 0.166                               | -0.220                 | 0.271                               | 0.598                                 | -0.450                   | 0.245                 | -0.278                             |
| Isorhamnetin-3-glucoside                             | -0.463              | -0.312                            | 0.066               | -0.334           | -0.162          | -0.487             | -0.250                           | -0.119             | 0.181                 | 0.708                              | 0.516                               | <b>-0.859</b>          | 0.126                               | 0.155                                 | -0.014                   | -0.611                | 0.187                              |
| Kaempferol-3,4'-diglucoside                          | 0.121               | 0.167                             | -0.169              | 0.049            | -0.118          | 0.176              | -0.410                           | 0.023              | -0.311                | 0.504                              | -0.056                              | -0.566                 | -0.042                              | <b>0.869</b>                          | 0.110                    | -0.279                | 0.021                              |
| Isorhamnetin-3,4'-diglucoside                        | 0.229               | -0.304                            | 0.275               | 0.044            | 0.170           | 0.181              | -0.111                           | -0.287             | -0.748                | 0.254                              | -0.240                              | -0.035                 | 0.306                               | 0.355                                 | -0.011                   | -0.119                | 0.597                              |
| Kaempferol-3-diglucoside-7-glucoside                 | 0.078               | -0.199                            | 0.534               | -0.242           | 0.620           | -0.085             | -0.293                           | 0.138              | -0.118                | 0.372                              | -0.446                              | 0.117                  | -0.384                              | 0.049                                 | 0.501                    | -0.384                | 0.122                              |
| Quercetin-3,3',4'-triglucoside                       | -0.152              | 0.148                             | 0.314               | -0.142           | 0.544           | -0.095             | -0.296                           | 0.252              | 0.302                 | 0.320                              | -0.041                              | -0.321                 | -0.469                              | -0.298                                | 0.705                    | <b>-0.767</b>         | 0.241                              |
| Kaempferol-3-(2-sinapoyl-glucoside)-4'-glucoside     | -0.504              | -0.010                            | 0.196               | -0.380           | 0.250           | -0.529             | -0.288                           | 0.306              | <b>0.782</b>          | 0.470                              | 0.322                               | -0.565                 | -0.485                              | -0.413                                | 0.511                    | <b>-0.793</b>         | -0.104                             |
| Quercetin-3,4'-diglucoside-3'-(6-caffeoyl-glucoside) | -0.156              | -0.355                            | 0.517               | -0.362           | 0.465           | -0.292             | -0.346                           | 0.000              | -0.092                | 0.674                              | -0.114                              | -0.329                 | -0.198                              | 0.118                                 | 0.395                    | -0.629                | 0.280                              |
| Total Flav.                                          | -0.026              | -0.164                            | 0.255               | -0.185           | 0.236           | -0.074             | -0.398                           | -0.034             | -0.278                | 0.664                              | -0.092                              | -0.485                 | -0.086                              | 0.493                                 | 0.281                    | -0.531                | 0.266                              |
| <i>Amino acids</i>                                   |                     |                                   |                     |                  |                 |                    |                                  |                    |                       |                                    |                                     |                        |                                     |                                       |                          |                       |                                    |
| Alanine                                              | 0.191               | 0.453                             | 0.115               | 0.121            | 0.499           | 0.323              | -0.370                           | 0.303              | -0.017                | 0.182                              | -0.322                              | -0.197                 | -0.503                              | 0.150                                 | 0.725                    | -0.552                | 0.174                              |
| Valine                                               | 0.456               | 0.217                             | 0.170               | 0.276            | 0.418           | 0.506              | -0.143                           | 0.074              | -0.495                | -0.145                             | -0.545                              | 0.289                  | -0.151                              | 0.129                                 | 0.405                    | -0.098                | 0.396                              |
| Leucine                                              | 0.177               | 0.699                             | -0.465              | 0.360            | -0.160          | 0.564              | -0.180                           | -0.031             | -0.300                | 0.174                              | 0.147                               | -0.632                 | 0.051                               | <b>0.773</b>                          | 0.099                    | -0.167                | 0.071                              |
| Threonine                                            | 0.533               | 0.591                             | -0.179              | 0.498            | 0.195           | <b>0.755</b>       | -0.185                           | 0.115              | -0.507                | -0.212                             | -0.427                              | 0.043                  | -0.127                              | 0.398                                 | 0.383                    | -0.081                | 0.336                              |
| Serine                                               | 0.129               | 0.750                             | -0.495              | 0.395            | -0.162          | 0.533              | 0.288                            | -0.035             | 0.017                 | -0.422                             | 0.194                               | -0.015                 | 0.075                               | 0.147                                 | -0.134                   | 0.366                 | -0.243                             |
| Proline                                              | -0.510              | -0.378                            | 0.369               | -0.537           | 0.232           | -0.716             | -0.381                           | 0.230              | 0.617                 | 0.674                              | 0.225                               | -0.539                 | -0.398                              | -0.282                                | 0.416                    | <b>-0.803</b>         | -0.034                             |
| Asparagine                                           | 0.268               | -0.239                            | 0.423               | 0.026            | 0.452           | 0.026              | -0.129                           | 0.222              | -0.091                | -0.245                             | -0.578                              | 0.579                  | -0.287                              | -0.513                                | 0.448                    | -0.170                | 0.366                              |
| Aspartic Acid                                        | 0.585               | 0.449                             | -0.167              | 0.544            | 0.114           | 0.719              | -0.286                           | 0.146              | -0.573                | -0.235                             | -0.480                              | 0.024                  | -0.080                              | 0.312                                 | 0.426                    | -0.208                | 0.573                              |
| Glutamic Acid                                        | 0.281               | 0.380                             | -0.020              | 0.148            | 0.256           | 0.388              | -0.440                           | 0.172              | -0.316                | 0.348                              | -0.327                              | -0.336                 | -0.303                              | 0.667                                 | 0.476                    | -0.394                | 0.124                              |
| Glutamine                                            | 0.646               | 0.494                             | -0.196              | 0.573            | 0.117           | 0.680              | -0.451                           | 0.398              | -0.367                | -0.323                             | -0.636                              | 0.100                  | -0.333                              | 0.178                                 | 0.644                    | -0.333                | 0.515                              |
| Total AA                                             | 0.449               | 0.657                             | -0.202              | 0.450            | 0.208           | 0.664              | -0.354                           | 0.264              | -0.301                | -0.076                             | -0.379                              | -0.174                 | -0.307                              | 0.383                                 | 0.576                    | -0.347                | 0.309                              |
| <i>Free sugars</i>                                   |                     |                                   |                     |                  |                 |                    |                                  |                    |                       |                                    |                                     |                        |                                     |                                       |                          |                       |                                    |
| Fructose                                             | -0.047              | 0.191                             | -0.240              | -0.016           | -0.177          | -0.283             | -0.547                           | <b>0.755</b>       | <b>0.850</b>          | -0.038                             | -0.153                              | -0.170                 | -0.749                              | -0.270                                | 0.578                    | -0.511                | -0.343                             |
| Glucose                                              | -0.506              | -0.309                            | -0.036              | -0.336           | -0.297          | -0.619             | -0.187                           | 0.057              | 0.530                 | 0.444                              | 0.518                               | -0.637                 | -0.006                              | -0.159                                | -0.045                   | -0.467                | -0.057                             |
| Galactose                                            | -0.267              | -0.091                            | -0.157              | -0.208           | -0.282          | -0.505             | -0.483                           | 0.485              | 0.733                 | 0.280                              | 0.131                               | -0.452                 | -0.458                              | -0.120                                | 0.309                    | -0.545                | -0.263                             |
| Sucrose                                              | 0.221               | 0.227                             | -0.473              | 0.253            | -0.470          | 0.529              | -0.150                           | 0.519              | 0.486                 | -0.570                             | -0.241                              | 0.359                  | 0.350                               | -0.188                                | 0.047                    | 0.263                 | -0.447                             |
| Total Sugar                                          | -0.342              | -0.146                            | -0.175              | -0.214           | -0.355          | -0.533             | -0.329                           | 0.342              | 0.699                 | 0.234                              | 0.287                               | -0.459                 | -0.274                              | -0.196                                | 0.131                    | -0.439                | -0.222                             |
| <i>Organic acids</i>                                 |                     |                                   |                     |                  |                 |                    |                                  |                    |                       |                                    |                                     |                        |                                     |                                       |                          |                       |                                    |
| Malic Acid                                           | 0.463               | -0.053                            | -0.064              | 0.446            | -0.095          | 0.280              | -0.356                           | 0.299              | -0.259                | -0.419                             | -0.464                              | 0.187                  | -0.073                              | -0.360                                | 0.434                    | -0.382                | <b>0.823</b>                       |
| Citric Acid                                          | 0.528               | <b>0.879</b>                      | -0.718              | 0.593            | -0.338          | 0.612              | -0.348                           | 0.641              | 0.228                 | -0.557                             | -0.424                              | 0.125                  | -0.538                              | 0.331                                 | 0.377                    | 0.115                 | -0.388                             |
| Total OA                                             | 0.683               | 0.329                             | -0.374              | 0.695            | -0.240          | 0.540              | -0.501                           | 0.571              | -0.156                | -0.653                             | -0.640                              | 0.238                  | -0.305                              | -0.210                                | 0.589                    | -0.325                | 0.640                              |
| <i>Headspace VOCs</i>                                |                     |                                   |                     |                  |                 |                    |                                  |                    |                       |                                    |                                     |                        |                                     |                                       |                          |                       |                                    |
| (E)-4-oxohex-2-enal (C1)                             | 0.527               | 0.006                             | -0.167              | 0.434            | -0.178          | 0.180              | -0.459                           | 0.637              | 0.115                 | -0.631                             | -0.676                              | 0.472                  | -0.419                              | -0.494                                | 0.544                    | -0.255                | 0.417                              |
| 4-isothiocyanato-1-butene (C2)                       | 0.246               | -0.057                            | -0.190              | 0.189            | -0.309          | 0.279              | -0.202                           | -0.246             | -0.701                | 0.283                              | -0.045                              | -0.367                 | 0.389                               | <b>0.818</b>                          | -0.230                   | 0.005                 | 0.340                              |
| 1-penten-3-ol (C3)                                   | 0.176               | <b>0.809</b>                      | -0.196              | 0.170            | 0.321           | 0.393              | -0.218                           | 0.446              | 0.326                 | -0.062                             | -0.260                              | -0.034                 | -0.669                              | 0.244                                 | 0.567                    | -0.142                | -0.480                             |
| 1-penten-3-one (C4)                                  | 0.183               | 0.460                             | 0.024               | 0.116            | 0.386           | 0.260              | 0.153                            | 0.308              | 0.315                 | -0.476                             | -0.350                              | 0.607                  | -0.481                              | -0.332                                | 0.311                    | 0.273                 | -0.440                             |
| 2-(1,1-dimethylethyl)-1H-indole (C5)                 | -0.179              | 0.031                             | 0.387               | -0.295           | 0.538           | 0.116              | 0.510                            | -0.584             | -0.412                | 0.341                              | 0.172                               | 0.103                  | 0.292                               | 0.391                                 | -0.353                   | 0.447                 | -0.296                             |
| 2-methyl-2-butenal (C6)                              | -0.362              | 0.515                             | 0.023               | -0.254           | 0.369           | 0.054              | 0.241                            | -0.186             | 0.233                 | 0.430                              | 0.418                               | -0.401                 | -0.134                              | 0.394                                 | -0.023                   | 0.053                 | -0.627                             |
| 2-hexenal (C7)                                       | -0.269              | 0.455                             | 0.049               | -0.223           | 0.371           | 0.097              | 0.469                            | -0.231             | 0.199                 | 0.123                              | 0.290                               | 0.050                  | -0.071                              | 0.230                                 | -0.210                   | 0.455                 | <b>-0.783</b>                      |
| (E)-2-hexenal (C8)                                   | -0.333              | 0.539                             | -0.035              | -0.250           | 0.313           | 0.004              | 0.072                            | -0.004             | 0.374                 | 0.446                              | 0.331                               | -0.437                 | -0.309                              | 0.412                                 | 0.111                    | -0.060                | -0.701                             |
| (Z)-2-penten-1-ol (C9)                               | -0.154              | 0.577                             | 0.022               | -0.161           | 0.432           | 0.177              | 0.168                            | -0.019             | 0.208                 | 0.245                              | 0.111                               | -0.107                 | -0.312                              | 0.391                                 | 0.105                    | 0.158                 | -0.706                             |
| (E)-2-pentenal (C10)                                 | -0.174              | 0.289                             | 0.143               | -0.198           | 0.401           | 0.011              | 0.523                            | -0.074             | 0.348                 | -0.228                             | 0.063                               | 0.515                  | -0.185                              | -0.231                                | -0.151                   | 0.582                 | <b>-0.772</b>                      |
| (E,E)-2,4-hexadienal (C11)                           | -0.148              | 0.561                             | -0.076              | -0.132           | 0.280           | 0.172              | -0.001                           | -0.010             | 0.132                 | 0.412                              | 0.163                               | -0.381                 | -0.267                              | 0.614                                 | 0.115                    | -0.009                | -0.596                             |
| 5-ethyl-2(5H)-furanone (C12)                         | -0.037              | 0.260                             | 0.068               | -0.235           | 0.290           | -0.035             | -0.027                           | 0.206              | 0.306                 | 0.170                              | -0.199                              | 0.190                  | -0.478                              | 0.341                                 | 0.119                    | 0.236                 | <b>-0.840</b>                      |
| 3-hexen-1-ol (C14)                                   | 0.611               | 0.435                             | -0.295              | 0.627            | -0.059          | 0.555              | -0.416                           | 0.541              | -0.089                | -0.603                             | -0.596                              | 0.245                  | -0.374                              | -0.231                                | 0.636                    | -0.313                | 0.519                              |
| 3-hexenal (C15)                                      | 0.258               | <b>0.792</b>                      | -0.226              | 0.317            | 0.256           | 0.631              | 0.136                            | 0.057              | -0.115                | -0.247                             | -0.140                              | 0.109                  | -0.196                              | 0.306                                 | 0.182                    | 0.232                 | -0.263                             |
| (Z)-3-hexenal (C16)                                  | <b>-0.810</b>       | 0.004                             | 0.530               | -0.711           | 0.691           | -0.488             | 0.390                            | -0.384             | 0.457                 | <b>0.760</b>                       | 0.696                               | -0.479                 | -0.060                              | -0.121                                | -0.030                   | -0.217                | -0.483                             |
| 3-octyne (C17)                                       | 0.316               | 0.086                             | 0.208               | 0.219            | 0.379           | 0.239              | -0.252                           | 0.292              | -0.097                | -0.232                             | -0.481                              | 0.258                  | -0.323                              | -0.384                                | 0.611                    | -0.400                | 0.515                              |
| 3-pentanone (C18)                                    | 0.430               | 0.347                             | -0.227              | 0.294            | -0.027          | 0.300              | -0.019                           | 0.468              | 0.226                 | -0.694                             | -0.575                              | <b>0.773</b>           | -0.451                              |                                       |                          |                       |                                    |

|                                                                  |        |               |        |        |        |        |               |               |        |               |              |              |               |        |               |               |               |
|------------------------------------------------------------------|--------|---------------|--------|--------|--------|--------|---------------|---------------|--------|---------------|--------------|--------------|---------------|--------|---------------|---------------|---------------|
| 5-nonanone oxime (C21)                                           | 0.144  | -0.416        | 0.124  | 0.092  | -0.119 | 0.038  | 0.557         | -0.369        | -0.365 | -0.589        | -0.084       | <b>0.790</b> | 0.536         | -0.445 | -0.582        | 0.746         | 0.172         |
| 1-isothiocyanato-3-methylbutane (C23)                            | -0.485 | -0.595        | 0.554  | -0.480 | 0.304  | -0.337 | <b>0.937</b>  | <b>-0.913</b> | -0.315 | 0.117         | 0.540        | 0.346        | <b>0.794</b>  | -0.317 | <b>-0.869</b> | 0.701         | -0.071        |
| Ethylidene-cyclopropane (C24)                                    | -0.231 | 0.061         | 0.168  | -0.413 | 0.272  | -0.233 | -0.009        | 0.046         | 0.285  | 0.444         | 0.008        | -0.042       | -0.332        | 0.413  | -0.006        | 0.139         | <b>-0.798</b> |
| 2-ethyl-furan (C26)                                              | 0.002  | -0.462        | 0.045  | -0.166 | -0.270 | -0.202 | -0.117        | -0.198        | -0.339 | 0.341         | -0.019       | -0.116       | 0.282         | 0.498  | -0.354        | 0.129         | 0.000         |
| 3-methyl-furan (C27)                                             | 0.310  | 0.410         | -0.161 | 0.224  | 0.105  | 0.162  | <b>-0.846</b> | <b>0.793</b>  | 0.332  | 0.104         | -0.520       | -0.303       | <b>-0.840</b> | 0.120  | <b>0.979</b>  | <b>-0.841</b> | 0.128         |
| Hexyl isothiocyanate (C29)                                       | -0.327 | -0.699        | 0.132  | -0.205 | -0.346 | -0.433 | 0.201         | -0.476        | -0.214 | 0.217         | 0.489        | -0.277       | 0.681         | -0.203 | -0.541        | -0.031        | 0.483         |
| 2-oxo-methyl ester hexanoic acid (C30)                           | -0.136 | 0.088         | 0.135  | -0.349 | 0.267  | -0.318 | -0.339        | 0.471         | 0.610  | 0.325         | -0.235       | 0.006        | -0.732        | 0.133  | 0.411         | -0.200        | -0.739        |
| Pentyl isothiocyanate (C31)                                      | -0.565 | -0.613        | 0.151  | -0.383 | -0.273 | -0.543 | 0.471         | -0.618        | -0.016 | 0.281         | 0.749        | -0.280       | 0.717         | -0.208 | -0.750        | 0.202         | 0.087         |
| Iberverin (C33)                                                  | -0.372 | -0.608        | 0.101  | -0.219 | -0.334 | -0.335 | 0.514         | -0.710        | -0.321 | 0.138         | 0.626        | -0.147       | <b>0.881</b>  | -0.096 | <b>-0.844</b> | 0.356         | 0.263         |
| Propanoic acid anhydride (C34)                                   | -0.504 | 0.116         | 0.201  | -0.546 | 0.340  | -0.396 | -0.045        | 0.021         | 0.511  | 0.709         | 0.323        | -0.456       | -0.368        | 0.328  | 0.103         | -0.199        | -0.751        |
| 4-methyl-2-(2-methyl-propenyl)-pyridine (C35)                    | -0.529 | 0.214         | 0.364  | -0.527 | 0.624  | -0.177 | 0.471         | -0.370        | 0.242  | 0.513         | 0.443        | -0.151       | -0.061        | 0.187  | -0.165        | 0.219         | -0.734        |
| Pyrrolidine-1-dithiocarboxylic acid 2-oxocyclopentyl ester (C36) | -0.323 | -0.702        | 0.136  | -0.246 | -0.346 | -0.386 | 0.381         | -0.633        | -0.340 | 0.204         | 0.508        | -0.140       | <b>0.809</b>  | -0.029 | <b>-0.778</b> | 0.285         | 0.278         |
| 3-ethyl-thiophene (C37)                                          | -0.180 | 0.149         | 0.125  | -0.210 | 0.256  | 0.073  | -0.025        | -0.308        | -0.288 | 0.676         | 0.237        | -0.563       | 0.103         | 0.720  | -0.042        | -0.157        | -0.108        |
| Tetrahydrothiophene (C38)                                        | -0.276 | <b>-0.790</b> | 0.212  | -0.225 | -0.295 | -0.412 | 0.361         | -0.571        | -0.319 | 0.095         | 0.404        | 0.002        | <b>0.765</b>  | -0.243 | -0.689        | 0.235         | 0.405         |
| [Unknown 2] (C39)                                                | -0.437 | 0.461         | 0.099  | -0.334 | 0.434  | -0.030 | 0.299         | -0.206        | 0.308  | 0.446         | 0.454        | -0.358       | -0.148        | 0.293  | -0.036        | 0.067         | -0.681        |
| [Unknown 8] (C40)                                                | -0.469 | -0.018        | 0.032  | -0.255 | -0.021 | -0.070 | <b>0.757</b>  | <b>-0.787</b> | -0.204 | 0.224         | <b>0.775</b> | -0.216       | 0.714         | 0.218  | <b>-0.832</b> | 0.587         | -0.295        |
| [Unknown 9] (C41)                                                | -0.253 | 0.165         | 0.054  | -0.336 | 0.178  | -0.160 | -0.182        | 0.021         | 0.184  | 0.659         | 0.153        | -0.481       | -0.266        | 0.633  | 0.085         | -0.170        | -0.554        |
| Vinylfuran (C42)                                                 | 0.358  | 0.036         | -0.205 | 0.183  | -0.225 | 0.126  | 0.048         | 0.290         | 0.096  | -0.592        | -0.476       | <b>0.764</b> | -0.198        | -0.063 | -0.129        | 0.615         | -0.460        |
| <i>Polyatomic ions</i>                                           |        |               |        |        |        |        |               |               |        |               |              |              |               |        |               |               |               |
| Chloride                                                         | 0.068  | -0.739        | 0.189  | -0.014 | -0.270 | -0.144 | 0.267         | -0.469        | -0.592 | -0.133        | 0.014        | 0.313        | 0.707         | -0.140 | -0.588        | 0.359         | 0.531         |
| Nitrate                                                          | 0.382  | 0.090         | 0.194  | 0.202  | 0.356  | 0.428  | 0.350         | -0.137        | -0.433 | -0.506        | -0.454       | <b>0.817</b> | 0.077         | -0.142 | -0.066        | 0.564         | 0.041         |
| Phosphate                                                        | -0.237 | -0.556        | 0.659  | -0.354 | 0.508  | -0.248 | 0.725         | -0.560        | -0.210 | -0.148        | 0.096        | 0.698        | 0.421         | -0.642 | -0.435        | 0.529         | 0.065         |
| Sulphate                                                         | -0.041 | -0.213        | 0.515  | -0.256 | 0.572  | -0.064 | 0.563         | -0.241        | -0.044 | -0.268        | -0.205       | <b>0.871</b> | 0.020         | -0.441 | -0.199        | 0.618         | -0.331        |
| <i>Compound ratios</i>                                           |        |               |        |        |        |        |               |               |        |               |              |              |               |        |               |               |               |
| Total Sugar:GSL ratio                                            | 0.194  | 0.550         | -0.555 | 0.362  | -0.356 | 0.131  | -0.488        | 0.751         | 0.650  | -0.371        | -0.174       | -0.155       | -0.623        | -0.190 | 0.551         | -0.384        | -0.165        |
| Glucose:GSL                                                      | 0.096  | 0.528         | -0.521 | 0.319  | -0.334 | 0.091  | -0.458        | 0.659         | 0.635  | -0.263        | -0.034       | -0.312       | -0.540        | -0.201 | 0.529         | -0.479        | -0.073        |
| Fructose:GSL                                                     | 0.307  | 0.588         | -0.492 | 0.398  | -0.230 | 0.210  | -0.533        | <b>0.838</b>  | 0.619  | -0.444        | -0.366       | 0.009        | -0.748        | -0.219 | 0.683         | -0.379        | -0.164        |
| Galactose:GSL                                                    | 0.063  | 0.358         | -0.427 | 0.162  | -0.317 | -0.107 | -0.636        | <b>0.791</b>  | 0.753  | -0.089        | -0.152       | -0.313       | -0.715        | -0.124 | 0.614         | -0.573        | -0.221        |
| Sucrose:GSL                                                      | 0.431  | 0.569         | -0.623 | 0.521  | -0.428 | 0.377  | -0.191        | 0.600         | 0.362  | <b>-0.761</b> | -0.360       | 0.367        | -0.413        | -0.133 | 0.224         | 0.222         | -0.299        |
| Sugar:ITC ratio                                                  | 0.227  | 0.637         | -0.567 | 0.292  | -0.306 | 0.153  | -0.603        | <b>0.820</b>  | 0.649  | -0.194        | -0.279       | -0.202       | <b>-0.777</b> | 0.151  | 0.595         | -0.349        | -0.436        |
| Acid:sugar ratio                                                 | 0.534  | 0.155         | 0.056  | 0.386  | 0.215  | 0.591  | 0.217         | -0.108        | -0.614 | -0.547        | -0.514       | 0.699        | 0.144         | -0.009 | -0.015        | 0.459         | 0.286         |

Numbers in bold indicate a significant correlation (Pearson  $n-1$ ); green = significance at  $P<0.05$ ; orange = significance at  $P<0.01$ . \* = significant differences observed between rocket accessions; ^ = agglomerative hierarchical cluster with <20 individuals
