# Supplementary material for: The influence of phytochemical composition and resulting sensory attributes on preference for salad rocket (Eruca sativa) accessions by consumers of varying TAS2R38 diplotype
Source: PubMed Central journal article supplement — Food Chem. 2017 May 1;222:6–17. doi: 10.1016/j.foodchem.2016.11.153 (PMC5243146; doi:10.1016/j.foodchem.2016.11.153), 2017-05-01
Supplement: mmc2.pdf [file mmc2.pdf]

**Table S2** Summary table of correlation coefficients between mouthfeel liking, taste liking and perception agglomerative hierarchical clusters, and sensory data variables within a PCA of consumer liking scores.

| Sensory attribute    | Mouthfeel liking C1 | Mouthfeel liking C2*^ | Mouthfeel liking C3 | Taste liking C1* | Taste liking C2 | Purchase intent C1 | Purchase intent C2*^ | Purchase intent C3 | Bitter perception C1* | Bitter perception C2*^ | Hotness perception C1*^ | Hotness perception C2* | Hotness perception C3*^ | Sweetness perception C2*^ | Sweetness perception C3* | Pepper perception C1* | Pepper perception C3*^ |
|----------------------|---------------------|-----------------------|---------------------|------------------|-----------------|--------------------|----------------------|--------------------|-----------------------|------------------------|-------------------------|------------------------|-------------------------|---------------------------|--------------------------|-----------------------|------------------------|
| Sulfury_O            | -0.041              | -0.299                | -0.274              | 0.158            | -0.599          | -0.198             | 0.079                | -0.006             | 0.130                 | -0.382                 | 0.226                   | 0.038                  | 0.334                   | -0.456                    | -0.319                   | 0.087                 | 0.290                  |
| Green_O              | 0.305               | 0.339                 | -0.408              | 0.284            | -0.302          | 0.255              | 0.126                | 0.285              | 0.205                 | -0.652                 | -0.282                  | 0.592                  | -0.189                  | -0.016                    | -0.151                   | 0.634                 | -0.562                 |
| Stalky_O             | 0.000               | -0.087                | -0.320              | 0.192            | -0.526          | 0.123              | 0.566                | -0.455             | -0.281                | -0.449                 | 0.352                   | 0.241                  | 0.707                   | -0.029                    | <b>-0.820</b>            | <b>0.765</b>          | -0.023                 |
| Pepper_O             | -0.059              | -0.524                | 0.277               | -0.249           | 0.014           | -0.247             | 0.508                | -0.328             | -0.133                | -0.242                 | -0.064                  | 0.742                  | 0.327                   | -0.225                    | -0.606                   | <b>0.785</b>          | -0.328                 |
| Earthy_O             | 0.373               | 0.560                 | -0.344              | 0.209            | -0.045          | 0.307              | -0.508               | 0.610              | 0.219                 | -0.043                 | -0.519                  | 0.033                  | -0.691                  | 0.559                     | 0.471                    | -0.062                | -0.545                 |
| Burnt rubber_O       | -0.157              | -0.730                | 0.162               | -0.111           | -0.308          | -0.373             | 0.325                | -0.360             | -0.159                | -0.199                 | 0.228                   | 0.256                  | 0.593                   | -0.527                    | -0.543                   | 0.255                 | 0.401                  |
| Pungent_O            | 0.246               | -0.118                | -0.364              | 0.458            | -0.593          | 0.251              | 0.224                | -0.214             | -0.388                | -0.600                 | 0.107                   | 0.174                  | 0.611                   | -0.253                    | -0.436                   | 0.313                 | 0.588                  |
| Sweet_O              | -0.287              | 0.281                 | 0.390               | -0.331           | 0.732           | -0.034             | 0.480                | -0.128             | 0.330                 | 0.032                  | 0.101                   | 0.345                  | -0.265                  | -0.273                    | 0.065                    | 0.290                 | -0.623                 |
| Aromatic_O           | -0.140              | 0.049                 | -0.395              | -0.058           | -0.519          | -0.247             | -0.126               | 0.223              | 0.455                 | 0.014                  | 0.192                   | -0.191                 | -0.121                  | 0.186                     | -0.202                   | 0.129                 | -0.545                 |
| Mustard_O            | 0.169               | -0.330                | -0.388              | 0.295            | <b>-0.782</b>   | 0.056              | 0.101                | -0.257             | -0.424                | -0.311                 | 0.154                   | 0.001                  | 0.669                   | 0.108                     | -0.617                   | 0.349                 | 0.403                  |
| Sweet_T              | -0.083              | 0.266                 | 0.346               | -0.239           | 0.667           | 0.160              | 0.380                | -0.222             | -0.072                | 0.138                  | -0.068                  | 0.319                  | -0.141                  | 0.191                     | -0.021                   | 0.387                 | -0.539                 |
| Sour_T               | -0.027              | -0.613                | 0.088               | 0.048            | -0.323          | -0.192             | 0.309                | -0.348             | -0.283                | -0.322                 | 0.160                   | 0.278                  | 0.623                   | -0.519                    | -0.486                   | 0.242                 | 0.561                  |
| Bitter_T             | -0.549              | -0.497                | 0.202               | -0.351           | -0.127          | -0.356             | 0.724                | <b>-0.855</b>      | -0.241                | 0.239                  | <b>0.811</b>            | -0.187                 | <b>0.898</b>            | -0.115                    | <b>-0.906</b>            | 0.437                 | 0.075                  |
| Savoury_T            | 0.082               | -0.151                | -0.460              | 0.219            | -0.753          | -0.009             | 0.183                | -0.113             | -0.073                | -0.405                 | 0.180                   | 0.132                  | 0.444                   | 0.035                     | -0.610                   | 0.518                 | -0.062                 |
| Green_F              | 0.503               | 0.371                 | -0.289              | 0.313            | -0.094          | 0.351              | -0.141               | 0.494              | 0.124                 | -0.584                 | -0.647                  | 0.685                  | -0.472                  | 0.103                     | 0.185                    | 0.445                 | -0.503                 |
| Stalky_F             | -0.151              | -0.270                | -0.185              | 0.094            | -0.475          | -0.089             | 0.508                | -0.430             | -0.131                | -0.365                 | 0.463                   | 0.112                  | 0.694                   | -0.346                    | -0.697                   | 0.470                 | 0.207                  |
| Peppery_F            | -0.125              | -0.746                | 0.438               | -0.275           | 0.072           | -0.323             | 0.576                | -0.487             | -0.268                | -0.216                 | 0.029                   | 0.703                  | 0.529                   | -0.461                    | -0.634                   | 0.649                 | 0.049                  |
| Mustard_F            | 0.131               | -0.618                | 0.086               | 0.067            | -0.323          | -0.034             | 0.400                | -0.481             | -0.589                | -0.327                 | -0.004                  | 0.487                  | 0.735                   | -0.143                    | -0.700                   | 0.606                 | 0.380                  |
| Sulfury_F            | -0.191              | -0.600                | -0.049              | -0.071           | -0.520          | -0.291             | 0.339                | -0.479             | -0.262                | -0.064                 | 0.416                   | -0.015                 | 0.751                   | -0.140                    | -0.745                   | 0.347                 | 0.285                  |
| Earthy_F             | <b>-0.849</b>       | -0.632                | 0.579               | <b>-0.872</b>    | 0.316           | <b>-0.950</b>      | 0.199                | -0.273             | 0.569                 | <b>0.773</b>           | 0.603                   | -0.352                 | 0.008                   | -0.301                    | -0.204                   | -0.230                | -0.417                 |
| Bitter_AE            | -0.221              | -0.711                | 0.303               | -0.302           | -0.111          | -0.285             | 0.519                | -0.717             | -0.511                | 0.166                  | 0.302                   | 0.192                  | <b>0.785</b>            | 0.081                     | <b>-0.836</b>            | 0.569                 | 0.099                  |
| Sweet_AE             | -0.066              | 0.430                 | 0.198               | -0.202           | 0.586           | 0.097              | -0.203               | 0.195              | 0.191                 | 0.445                  | -0.149                  | -0.208                 | -0.559                  | 0.384                     | 0.494                    | -0.285                | -0.441                 |
| Acid_AE              | -0.086              | -0.655                | 0.025               | 0.000            | -0.443          | -0.282             | 0.233                | -0.330             | -0.228                | -0.206                 | 0.232                   | 0.130                  | 0.627                   | -0.400                    | -0.531                   | 0.195                 | 0.494                  |
| Savoury_AE           | -0.263              | -0.084                | -0.223              | -0.187           | -0.389          | -0.261             | 0.274                | -0.159             | 0.246                 | 0.020                  | 0.365                   | -0.017                 | 0.206                   | 0.174                     | -0.569                   | 0.497                 | -0.616                 |
| Peppery_AE           | -0.257              | <b>-0.852</b>         | 0.466               | -0.381           | 0.029           | -0.492             | 0.527                | -0.484             | -0.151                | -0.079                 | 0.148                   | 0.549                  | 0.527                   | -0.502                    | -0.637                   | 0.519                 | 0.049                  |
| Mustard_AE           | -0.081              | -0.684                | 0.218               | -0.130           | -0.200          | -0.191             | 0.574                | -0.622             | -0.483                | -0.190                 | 0.183                   | 0.459                  | <b>0.785</b>            | -0.199                    | <b>-0.822</b>            | 0.681                 | 0.203                  |
| Green_AE             | 0.479               | 0.448                 | -0.337              | 0.457            | -0.123          | 0.555              | 0.259                | 0.134              | -0.137                | <b>-0.805</b>          | -0.390                  | 0.742                  | -0.042                  | -0.038                    | -0.127                   | 0.710                 | -0.270                 |
| Earthy_AE            | -0.587              | 0.087                 | 0.182               | -0.568           | 0.297           | -0.562             | -0.027               | 0.204              | <b>0.875</b>          | 0.502                  | 0.346                   | -0.316                 | -0.522                  | -0.104                    | 0.191                    | -0.240                | <b>-0.830</b>          |
| Warming_AE           | -0.034              | <b>-0.758</b>         | 0.257               | -0.188           | -0.177          | -0.387             | 0.266                | -0.203             | -0.109                | -0.242                 | -0.088                  | 0.592                  | 0.348                   | -0.432                    | -0.472                   | 0.443                 | 0.076                  |
| Initial heat_MF      | -0.264              | -0.740                | 0.252               | -0.249           | -0.200          | -0.380             | 0.599                | -0.604             | -0.250                | -0.125                 | 0.349                   | 0.357                  | 0.746                   | -0.381                    | <b>-0.815</b>            | 0.580                 | 0.138                  |
| Leaf spikiness_MF    | -0.295              | -0.466                | 0.318               | -0.493           | 0.120           | -0.697             | -0.331               | 0.374              | 0.638                 | 0.347                  | -0.113                  | 0.015                  | -0.502                  | -0.292                    | 0.279                    | -0.351                | -0.370                 |
| Crisp_MF             | 0.065               | -0.083                | 0.009               | -0.070           | -0.050          | 0.103              | 0.475                | -0.357             | -0.304                | -0.174                 | -0.030                  | 0.510                  | 0.328                   | 0.307                     | -0.623                   | <b>0.874</b>          | -0.492                 |
| Chewy_MF             | -0.221              | -0.410                | 0.080               | -0.370           | -0.184          | -0.492             | -0.242               | 0.079              | 0.218                 | 0.451                  | 0.051                   | -0.209                 | -0.103                  | 0.274                     | -0.118                   | -0.091                | -0.345                 |
| Tough_MF             | -0.017              | -0.099                | -0.147              | -0.142           | -0.270          | -0.214             | -0.461               | 0.235              | 0.121                 | 0.432                  | -0.076                  | -0.379                 | -0.226                  | 0.569                     | 0.071                    | -0.223                | -0.284                 |
| Moistness of Leaf_MF | 0.183               | 0.679                 | -0.072              | 0.253            | 0.391           | 0.511              | 0.157                | 0.091              | 0.007                 | -0.287                 | -0.136                  | 0.181                  | -0.251                  | -0.033                    | 0.302                    | 0.092                 | -0.128                 |
| Salivating_MF        | 0.485               | 0.019                 | 0.081               | 0.188            | 0.168           | 0.297              | 0.068                | 0.189              | -0.215                | -0.533                 | -0.695                  | <b>0.912</b>           | -0.207                  | -0.057                    | 0.051                    | 0.539                 | -0.203                 |
| Astringency_MF       | -0.699              | -0.543                | 0.497               | -0.563           | 0.260           | -0.657             | 0.157                | -0.405             | 0.199                 | 0.671                  | 0.668                   | -0.588                 | 0.283                   | -0.384                    | -0.102                   | -0.516                | 0.302                  |
| Tingly_MF            | -0.210              | <b>-0.774</b>         | 0.324               | -0.279           | -0.113          | -0.410             | 0.550                | -0.493             | -0.184                | -0.174                 | 0.188                   | 0.526                  | 0.599                   | -0.451                    | -0.715                   | 0.594                 | 0.057                  |
| Warming_MF           | -0.213              | <b>-0.778</b>         | 0.300               | -0.257           | -0.151          | -0.425             | 0.512                | -0.459             | -0.150                | -0.189                 | 0.201                   | 0.486                  | 0.590                   | -0.502                    | -0.681                   | 0.527                 | 0.115                  |

Numbers in bold indicate a significant correlation (Pearson  $n-1$ ); green = significance at  $P<0.05$ ; orange = significance at  $P<0.01$ . Abbreviations: A = appearance; O = odour; T = taste; F = flavour; MF = mouthfeel; AE = aftereffects. \* = significant differences observed between rocket accessions; ^ = agglomerative hierarchical cluster with <20 individuals
