# Supplementary material for: The influence of phytochemical composition and resulting sensory attributes on preference for salad rocket (Eruca sativa) accessions by consumers of varying TAS2R38 diplotype
Source: PubMed Central journal article supplement — Food Chem. 2017 May 1;222:6–17. doi: 10.1016/j.foodchem.2016.11.153 (PMC5243146; doi:10.1016/j.foodchem.2016.11.153), 2017-05-01
Supplement: mmc3.pdf [file mmc3.pdf]

**Table S3** Summary table of correlation coefficients between agglomerative hierarchical clusters for appearance traits and sensory data variables within a PCA of consumer appearance liking scores

| Appearance attribute   | Appearance liking C1 | Appearance liking C2* | Appearance liking C3*^ | Colour liking C1 | Colour liking C3* | Leaf shape liking C1 | Leaf shape liking C2 | Leaf shape liking C3* | Purchase intent C1 | Purchase intent C2*^ | Purchase intent C3 |
|------------------------|----------------------|-----------------------|------------------------|------------------|-------------------|----------------------|----------------------|-----------------------|--------------------|----------------------|--------------------|
| Depth of leaf colour_A | 0.084                | 0.507                 | 0.656                  | -0.117           | 0.626             | -0.635               | 0.180                | 0.753                 | -0.005             | 0.636                | -0.360             |
| Leaf shape_A           | 0.032                | 0.178                 | <b>0.819</b>           | -0.355           | 0.426             | <b>-0.887</b>        | 0.339                | <b>0.798</b>          | -0.207             | 0.425                | -0.045             |
| Size of leaves_A       | -0.176               | -0.543                | 0.274                  | -0.386           | -0.360            | -0.412               | 0.173                | 0.049                 | -0.372             | -0.415               | 0.554              |
| Hairiness_A            | -0.684               | -0.264                | 0.391                  | -0.149           | -0.003            | -0.160               | 0.356                | -0.099                | -0.383             | -0.563               | 0.738              |
| Purple Stem_A          | -0.039               | -0.749                | -0.492                 | -0.138           | -0.655            | 0.128                | -0.203               | -0.438                | 0.267              | <b>-0.932</b>        | <b>0.800</b>       |

Numbers in bold indicate a significant correlation (Pearson n-1); green = significance at P<0.05, orange = significance at P<0.01. Abbreviations: A = appearance; O = odour; T = taste; F = flavour; MF = mouthfeel; AE = aftereffects. \* = significant differences observed between rocket accessions; ^ = agglomerative hierarchical cluster with <20 individuals
