# Supplementary figures and images for: The influence of phytochemical composition and resulting sensory attributes on preference for salad rocket (Eruca sativa) accessions by consumers of varying TAS2R38 diplotype
Source: PubMed Central journal article supplement — Food Chem. 2017 May 1;222:6–17. doi: 10.1016/j.foodchem.2016.11.153 (PMC5243146; doi:10.1016/j.foodchem.2016.11.153), 2017-05-01

SR2

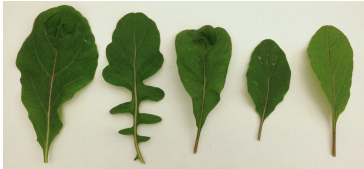

SR3

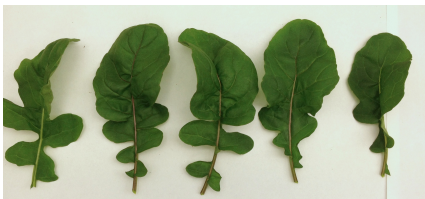

SR5

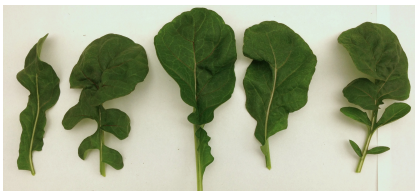

SR6

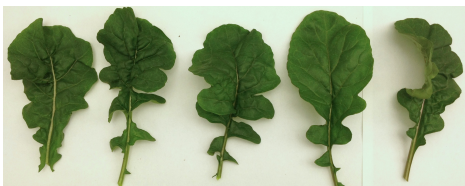

SR12

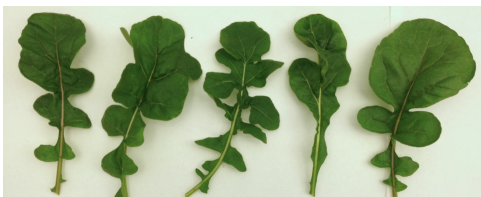

SR14

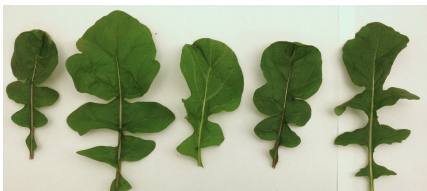

SR19

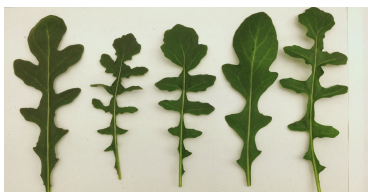

12cm

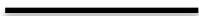

Supplement: mmc4.pdf [file mmc4.pdf]
